# Supplementary material
Source: HighWire-hosted journal article supplement (https://jnm.snmjournals.org/highwire/filestream/94760/field_highwire_adjunct_files/0/153023_Supplemental_Data.pdf)
Supplement: 153023_Supplemental_Data.pdf [file 153023_Supplemental_Data.pdf]

## Supplemental Methods

### Cell Culture

Supplemental Table 1. Overview of the human derived BC cell lines with corresponding molecular classification, ER-, PR-, HER2-status and GRP-R mRNA level. Cell lines were obtained from the department of Medical Oncology, Erasmus MC (Rotterdam, The Netherlands).

| Cell lines | Molecular classification | ER | PR | HER2 | mRNA GRP-R level |
|------------|--------------------------|----|----|------|------------------|
| SUM44PE    | Luminal                  | +  | +  | -    | 0.0183           |
| MCF7       | Luminal                  | +  | +  | -    | 0.0117           |
| T47D       | Luminal                  | +  | +  | -    | 0.0305           |
| UACC812    | Luminal                  | +  | +  | ++   | 0.0065           |
| BT474      | Luminal                  | +  | +  | ++   | 0.0492           |
| CAMA-1     | Luminal                  | +  | -  | -    | 0.0009           |
| SUM52PE    | Luminal                  | +  | -  | -    | 0.0241           |
| HCC1806    | Triple negative          | -  | -  | -    | 0.0001           |
| Hs578t     | Triple negative          | -  | -  | -    | 0.0017           |

Table was based on Riaz et al. (1); ER = Estrogen receptor, PR = Progesterone receptor, HER2 = Human epidermal growth factor receptor 2, GRP-R = Gastrin releasing peptide receptor.

### Internalization assay

Cells were seeded in 12-well plates, 300,000 cells/well/1 mL. The next day adhering cells were washed with PBS (GIBCO/Life Technologies) and incubated with  $10^{-9}$  M  $^{111}\text{In}$ -AMBA (without or with  $10^{-6}$  M Tyr<sup>4</sup>-bombesin) in internalization medium (RPMI1640, 20 mM HEPES and 1% bovine serum albumin (Sigma-Aldrich) for 1 h at 37°C. Cellular uptake was stopped by removing the supernatant and washing twice with cold PBS. The membrane-bound radiopeptide fraction was separated by 10 min treatment with acid solution (50 mM Glycine and 100 mM NaCl, pH=2.8) and collected. The residual cell fractions were lysed

with 0.1 M NaOH. Membrane bound and internalized fractions were counted in a  $\gamma$ -counter (1480 WIZARD automatic gamma counter, PerkinElmer). Counting time was 60 sec per sample with an isotope-specific energy window and a counting error not exceeding 5%.

### SRB protocol

Fixed cells were stained for 20 min at room temperature using 500  $\mu$ L of 0.5% sulforhodamine B (SRB) (Sigma-Aldrich) dissolved in 1% acetic acid (Merck Millipore). After repeated washing with 1% acetic acid, plates were left to dry at 37°C. Bound SRB was released by adding 1 mL 10 mM tris-(hydroxymethyl)aminomethane. The absorbance was measured at 510 nm using the Wallac Victor 1420 (PerkinElmer).

### In-vivo NanoSPECT/CT imaging of BC xenograft-bearing mice with GRP-R radioligands

Multi-pinhole mouse collimators with 9 pinholes (1.4 mm diameter) per head were used, acquisition was performed with a matrix of 256x256 and 20 projections (90 sec/projection). Reconstruction and quantification was performed using In-vivo Scope software 2.0. Bladder uptake was masked. Tumors and organs were counted in a  $\gamma$ -counter (PerkinElmer), after decay of radioactivity (13 d) to avoid dead time artifacts. Counting time was 60 sec per sample with an isotope-specific energy window and a counting error not exceeding 5%.

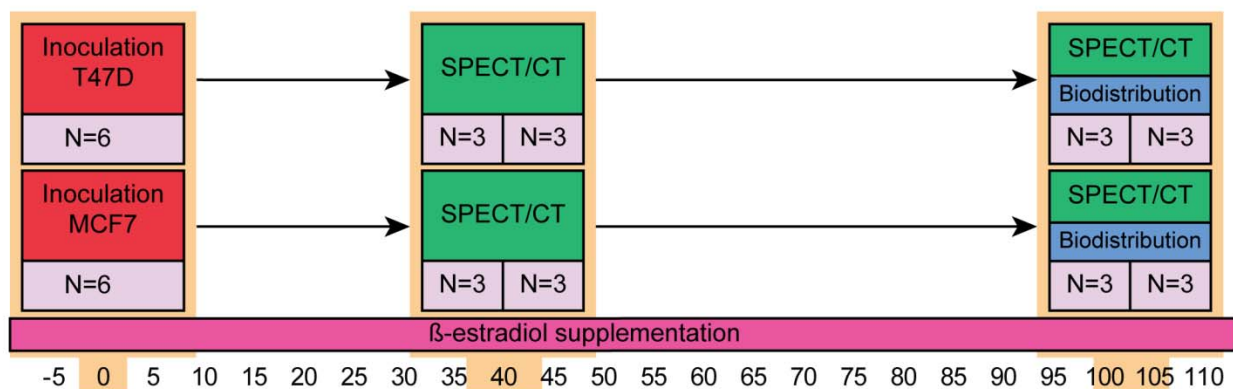

Supplemental Figure 1. Time line of in-vivo experiments. Seven days before orthotopic and subcutaneous tumor cell inoculation until the end of the experiment, animals were orally supplemented with  $\beta$ -estradiol (4 mg/L). Animals were inoculated with either T47D or MCF7 BC cell lines subcutaneously and orthotopically (in the 4<sup>th</sup> left mammary fat pad). SPECT/CT scans were performed at two time points after inoculation t1 (40 $\pm$ 3 d) and t2 (100 $\pm$ 3 d), 4 h post injection of  $\sim$ 35 MBq/200 pmol  $^{111}\text{In}$ -JMV4168 and 300  $\mu\text{g}$  phosphoramidon. Following the second scan animals were euthanized, tumors and organs were collected and weighed. After decay of radioactivity (13 d) to avoid dead time artifacts, samples were counted in a gamma counter.

### **Statistics**

Pearson's chi-squared exact test and a logistic regression were used to analyze the correlation between the extent of GRP-R expression and ER status of the human BC specimens. For correlation between ER, PR and HER2 status and internalization of  $^{111}\text{In}$ -AMBA by the BC cell lines a univariate ANOVA test was used. mRNA GRP-R levels and internalization of  $^{111}\text{In}$ -AMBA were correlated using Spearman's statistical test. A two tailed t-test was used to analyze the in-vitro cytotoxicity assay, and to determine differences in radiotracer uptake between T47D- and MCF7 xenografts and orthotopic and subcutaneous tumors.

## Supplemental Results

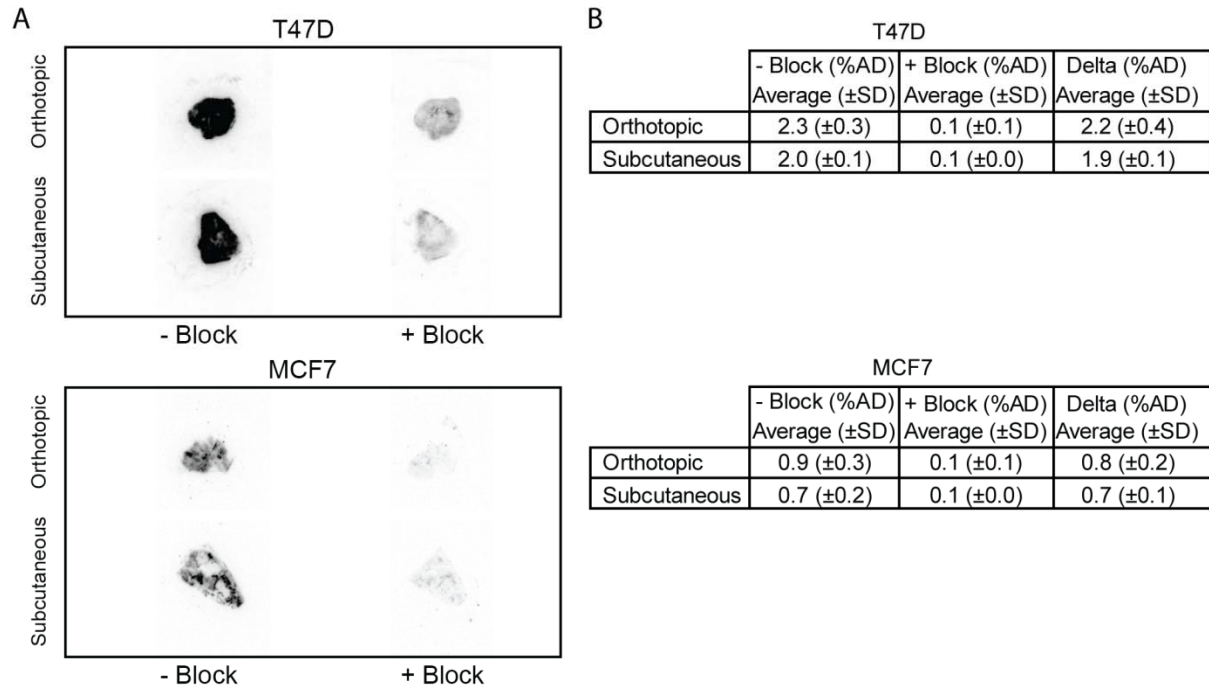

Supplemental Figure 2. A) In-vitro autoradiography of T47D and MCF7 xenografts displayed in figure 4 of the article. Tumors were excised, snap frozen and counted in the  $\gamma$ -counter for biodistribution purposes. When radioactivity had completely decayed, 10  $\mu\text{m}$  tumor slices were incubated with  $10^{-9}$  M  $^{111}\text{In}$ -JMV4168, without (-block) or with (+block)  $10^{-6}$  M of unlabeled Tyr<sup>4</sup>-bombesin for specificity control. B) Quantification of the autoradiography results calculated as percentage of added dose (%AD). Results were quantified using OptiQuant Software (Perkin Elmer) and expressed as arbitrary digital light units/ $\text{mm}^2$ . Autoradiography results confirmed higher binding in T47D xenografts (orthotopic:  $2.2 \pm 0.4\%$ AD, subcutaneous:  $1.9 \pm 0.1\%$ AD) compared to MCF7 xenografts (orthotopic:  $0.8 \pm 0.2\%$ AD, subcutaneous:  $0.7 \pm 0.1\%$ AD). Binding of  $^{111}\text{In}$ -JMV4168 was specific since low or no binding was observed when GRP-R was blocked by adding an excess of Tyr<sup>4</sup>-bombesin ( $0.1 \pm 0.1\%$  for orthotopic tumors and  $0.1 \pm 0.0\%$  for subcutaneous tumors).

1. Riaz M, van Jaarsveld MT, Hollestelle A, et al. miRNA expression profiling of 51 human breast cancer cell lines reveals subtype and driver mutation-specific miRNAs. *Breast Cancer Res.* 2013;15:R33.
